# Supplementary material
Source: PubMed Central journal article supplement (PMC7448830)
Supplement: jama-324-752-s002.pdf [file jama-324-752-s002.pdf]

## Supplementary Online Content

Forno E, Bacharier LB, Phipatanakul W, et al. Effect of vitamin D<sub>3</sub> supplementation on severe asthma exacerbations in children with asthma and low vitamin D levels: the Vit-D-Kids Asthma (VDKA) randomized clinical trial. *JAMA*. doi:10.1001/jama.2020.12384

**eTable.** Vitamin D Levels in Nonsupplemented Participants in the Placebo group  
**eFigure.** Time to First Viral-Induced Severe Asthma Exacerbation

This supplementary material has been provided by the authors to give readers additional information about their work.

**eTable.** Vitamin D Levels in Nonsupplemented Participants in the Placebo Group

|                          |                         | <b>Screening</b> | <b>16 weeks</b> | <b>32 weeks</b> | <b>48 weeks</b> |
|--------------------------|-------------------------|------------------|-----------------|-----------------|-----------------|
| <b>Non-supplemented*</b> | Mean, ng/ml             | 23.1             | 28.5            | 25.8            | 25.5            |
|                          | (95%CI)                 | (22.1-24.0)      | (26.1-30.8)     | (23.9-27.6)     | (23.8-27.2)     |
|                          | Percent $\geq$ 30 ng/ml | 0%               | 43.0%           | 29.7%           | 31.8%           |

\*Non-supplemented refers to participants in the placebo group excluding those who had low levels of vitamin D (<10 ng/ml at any point, or  $\geq$ 10 but <14 ng/ml in two visits) and therefore, according to protocol, were referred to Endocrinology for evaluation and management.

**eFigure.** Time to First Viral-Induced Severe Asthma Exacerbation

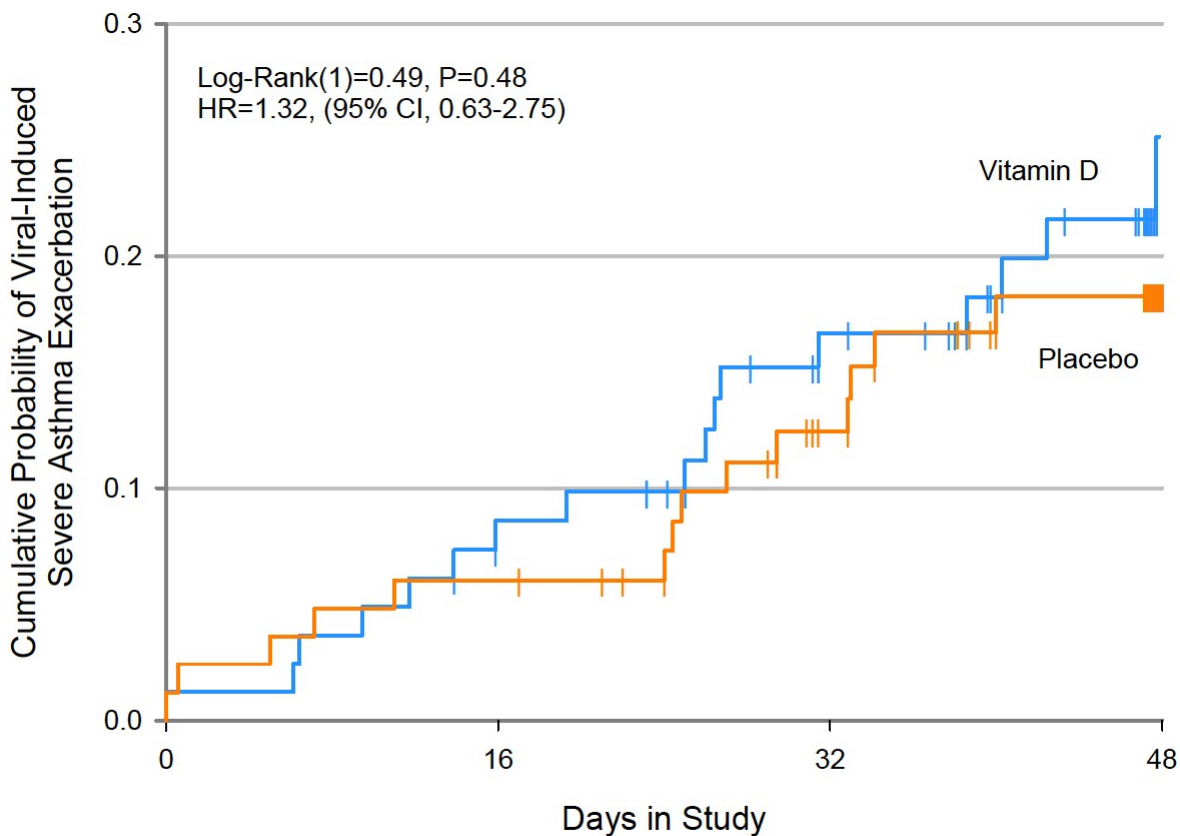

| N at Risk |    |  |    |  |    |
|-----------|----|--|----|--|----|
| Vitamin D | 82 |  | 74 |  | 59 |
| Placebo*  | 83 |  | 78 |  | 63 |
|           |    |  |    |  | 18 |
|           |    |  |    |  | 20 |

Vertical bars represent single censored events. The adjusted hazard ratio (HR) for time from randomization to a first viral-induced severe exacerbation was 1.32 (95% CI 0.63-2.75) for the vitamin D vs placebo treatment groups ( $P=0.48$ ). Models stratified for study site, sex, and race/ethnicity (see main text for details). Median observation time: 330 days [IQR 218-335] in the vitamin D group, 331 days [230-336] in the placebo group
