# Supplementary material
Source: PubMed Central journal article supplement (PMC7448830)
Supplement: jama-324-752-s003.pdf [file jama-324-752-s003.pdf]

## Data Sharing Statement

Forno. Effect of Vitamin D<sub>3</sub> Supplementation on Severe Asthma Exacerbations in Children With Asthma and Low Vitamin D Levels. *JAMA*. Published August 25, 2020. 10.1001/jama.2020.12384

### Data

**Data available:** Yes

**Data types:** Deidentified participant data, Data dictionary

**How to access data:** Requests for de-identified data and a data dictionary should be made to the corresponding author.

**When available:** beginning date: 12-15-2020

### Supporting Documents

**Document types:** None

### Additional Information

**Who can access the data:** Researchers whose proposed use of the data has been approved.

**Types of analyses:** Specified purpose (e.g., a meta-analysis).

**Mechanisms of data availability:** Signed data access agreement.
